# Supplementary material
Source: publisher site journal article supplement (https://www.dovepress.com/article/363912)
Supplement: Supplementary file 1 [file get_supplementary_file.php]

**Appendix 1. Structured Fatigue Interview used in the current study**

**STRUCTURED FATIGUE INTERVIEW**

Fatigue is an overwhelming feeling of tiredness which can lead to you having problems with moving, low energy, or problems keeping your eyes open. You might also feel as if you need to lie down or take a break from things you are doing like chores, schoolwork, or even fun activities.

1. Would you say you experience fatigue? Yes No *(If no, discontinue survey)*

Using your own words, how would you describe your fatigue?

___________________________________________________________________

___________________________________________________________________

___________________________________________________________________

___________________________________________________________________

2. Is your fatigue always present or is it episodic (does it come and go)?

___________________

If episodic,

1. How many times have you felt fatigued in the past month? ________
2. How long does your fatigue usually last in hours or days?

_________________________(Indicate hours or days)

3. When you are fatigued, how would you rate the severity of the fatigue on average in the past month using a 0-10 scale (0= no fatigue, 10= extremely fatigued)? _________

4. Do you see your fatigue as a big problem? Yes No

5. Does your fatigue get in the way of or prevent you from doing daily or weekly activities?

Yes No

If yes,

a) Using a 0-10 scale (0= no interference, 10= interferes with everything), on average, how would you

rate how much your fatigue has interfered with your daily activities in the past month?

______

b) Please list any weekly or daily activities your fatigue interferes with.

___________________________________________________________________

___________________________________________________________________

___________________________________________________________________

___________________________________________________________________
